# Supplementary material for: Shock Treatment: Using Immersive Digital Realism to Restage and Re-examine Milgram’s ‘Obedience to Authority’ Research
Source: PLoS One. 2015 Mar 2;10(3):e109015. doi: 10.1371/journal.pone.0109015 (PMC4346260; doi:10.1371/journal.pone.0109015)
Supplement: Data S1 — Milgram IDR data file. (XLSX) [file pone.0109015.s001.xlsx]

## Sheet: Sheet1
Participant	Day	Name	Condition		Condition Name	Sex	Age	Milgram % to 450	Milgram mean	Goes to	Ident E	Ident L	E-L
1	1	Rachel	0		No L feedback	2	1	100	450	450	7	5	2
2	1	Julie	0		No L feedback	2	1	100	450	300	10	2	8
3	1	Tom	5		Coronary	1	2	65	368.25	285	8	7	1
4	2	Mark	5		Coronary	1	1	65	368.25	450	5	5	0
5	2	Matthew	5		Coronary	1	1	65	368.25	210	0	9.5	-9.5
6	2	Sarah	5		Coronary	2	1	65	368.25	300	6	8	-2
7	2	Nina	5		Coronary	2	3	65	368.25	285	9	10	-1
8	3	George	17a		2 peers rebel	1	1	10	246.75	285	5	5	0
9	3	David	17a		2 peers rebel	1	1	10	246.75	195	4	9.5	-5.5
10	4	Nina	7		E absent	2	2	20.5	272.25	255	7	9	-2
11	4	Helena	7		E absent	2	3	20.5	272.25	195	5	10	-5
12	4	Harry	3		L Proximal	1	1	40	312	240	8	5.5	2.5
13	5	Ian	5		Coronary	1	3	65	368.25	315	10	8	2
14	5	Justin	5b		Coronary	1	2	82.5	368.25	450	9	5	4
						1 Male	1 Younger
						2 Female	2
							3 Older
